# Supplementary material for: Nuclear Export Protein CSE1L Interacts with P65 and Promotes NSCLC&nbsp;Growth via NF-κB/MAPK Pathway
Source: Research Square preprint supplement (doi:10.21203/rs.3.rs-130870/v1), 2020-12-23
Supplement: Supplementary file 1 [file 20e73b806a331cc7f58045b2.docx]

Figure S1


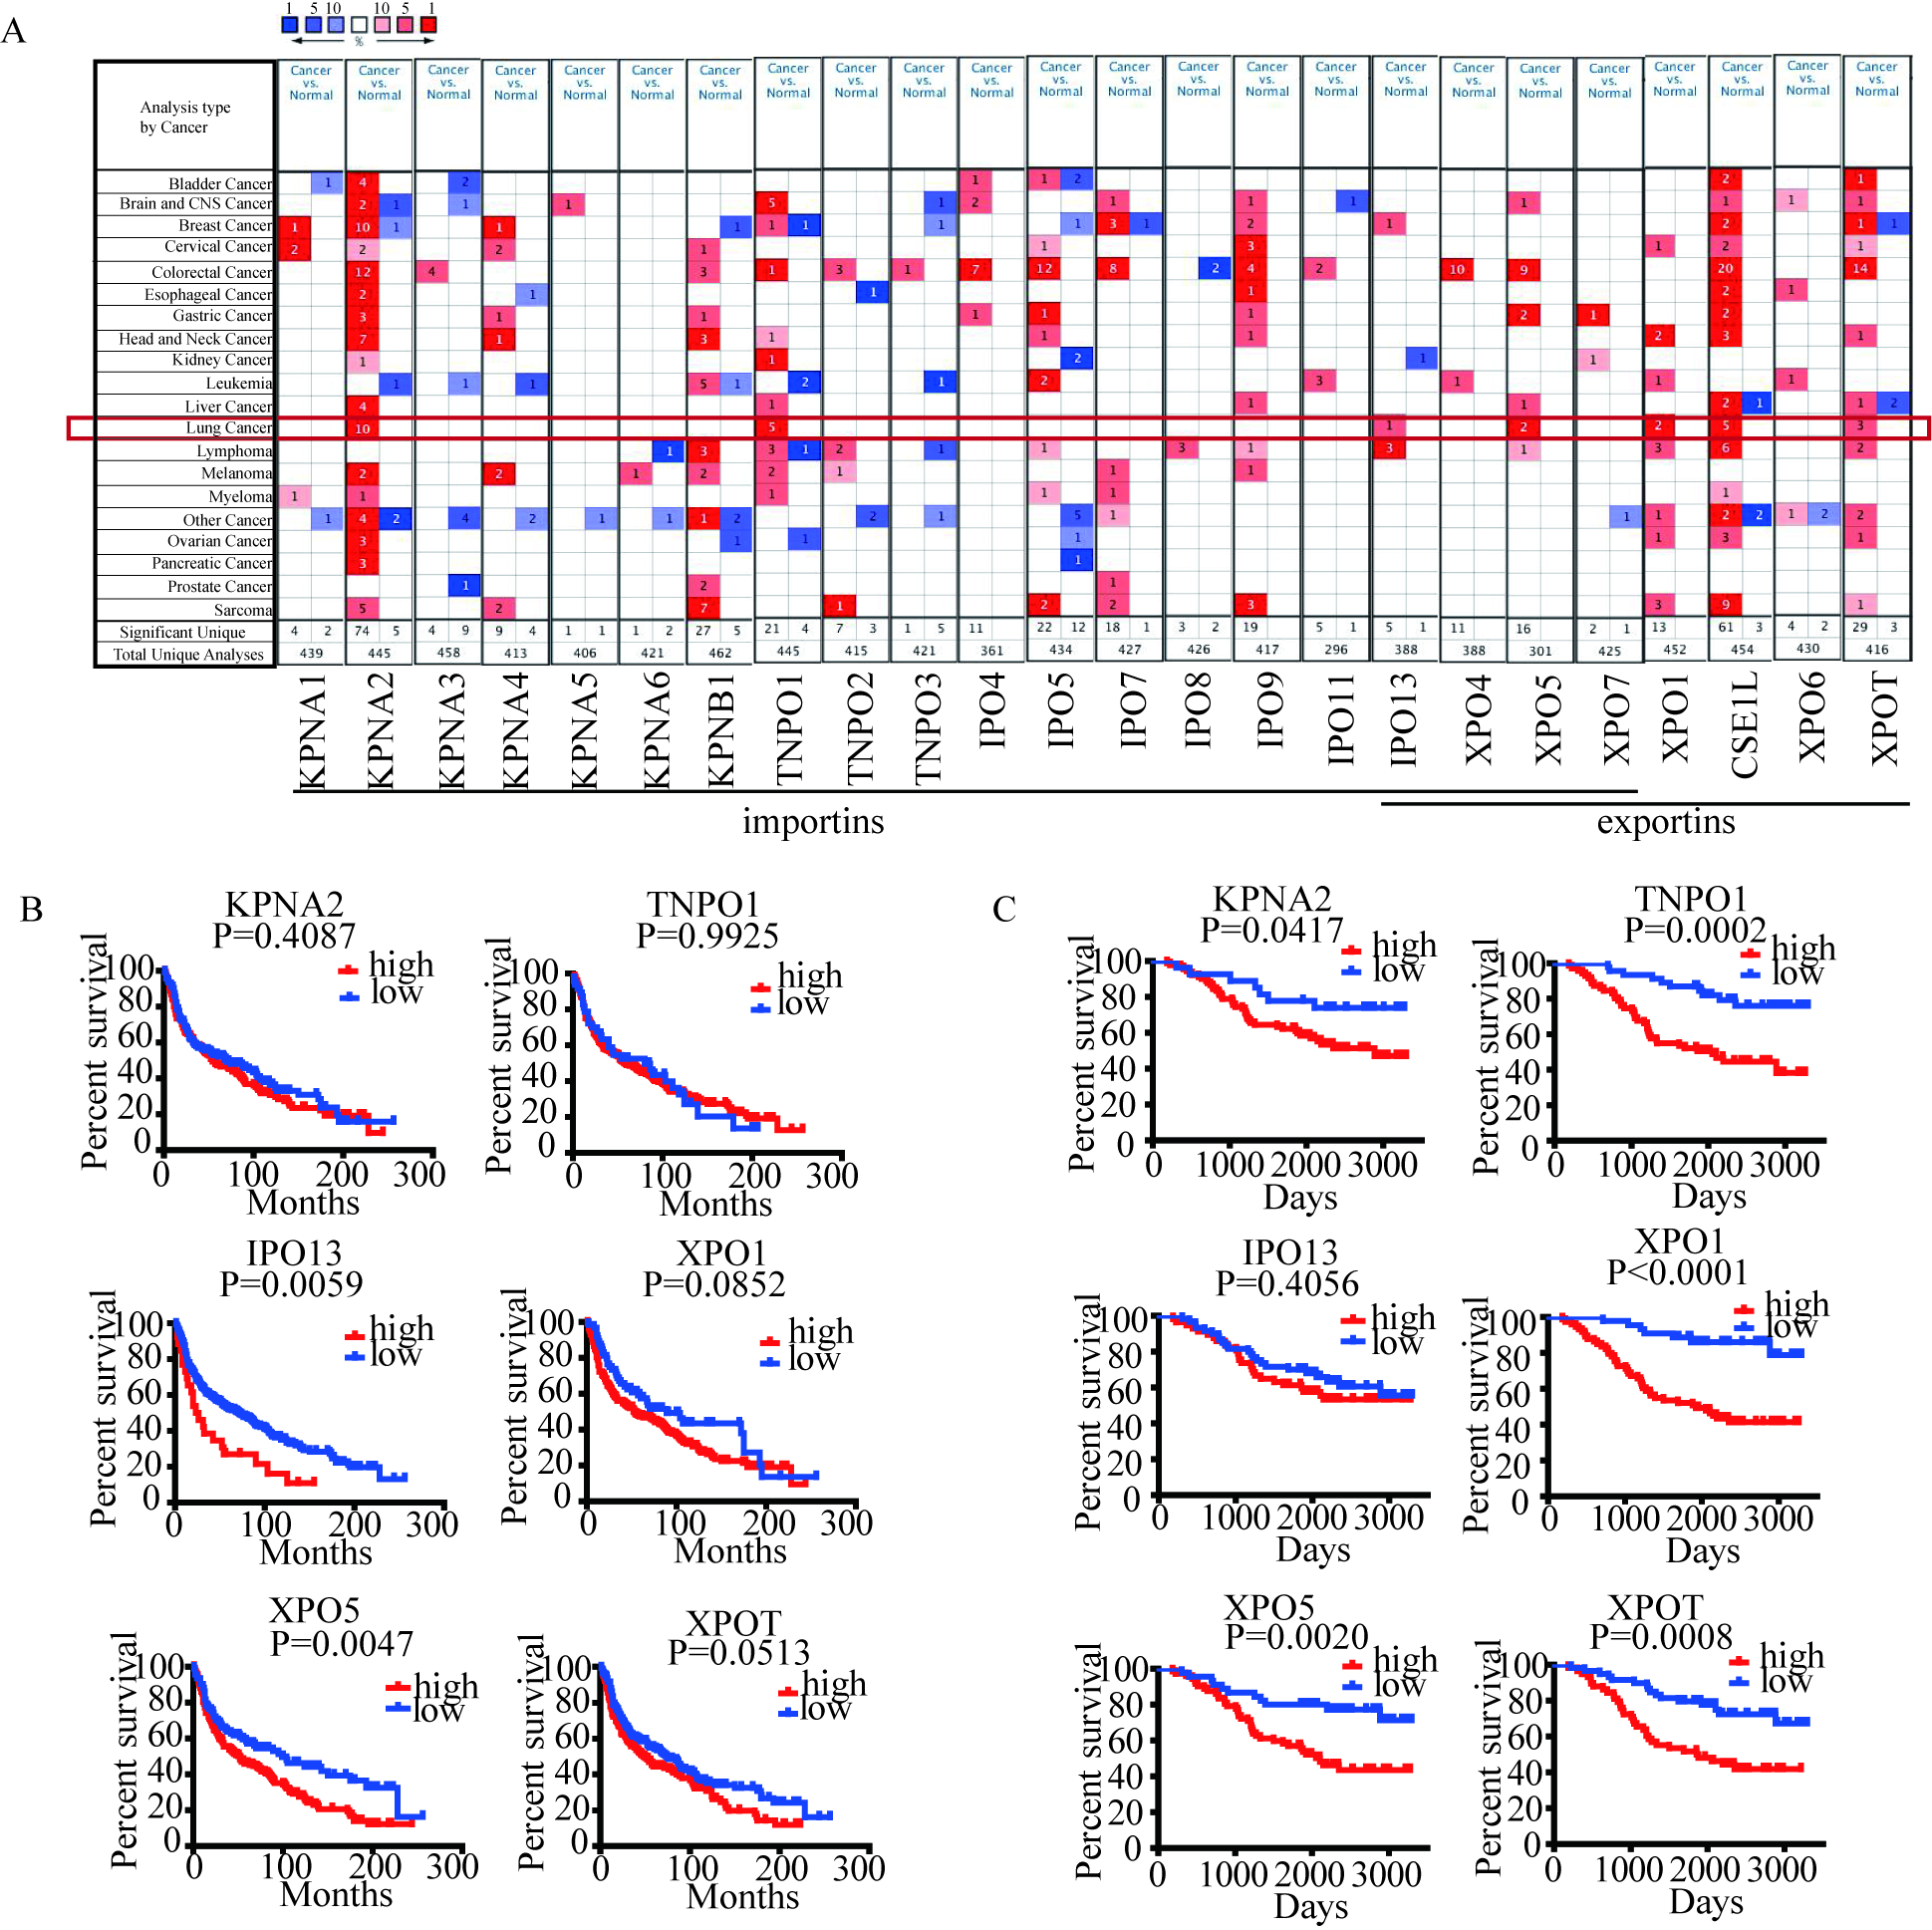


Figure S2


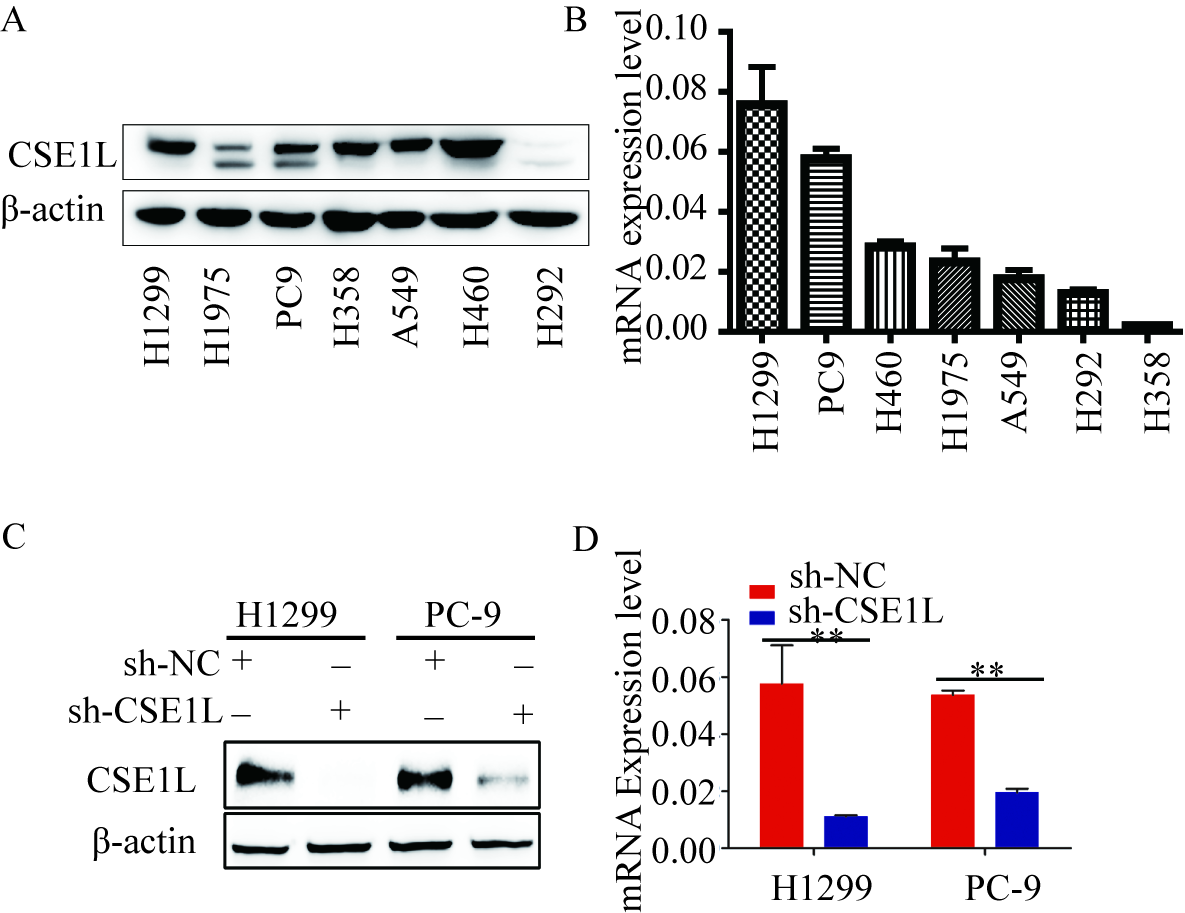


Figure S3


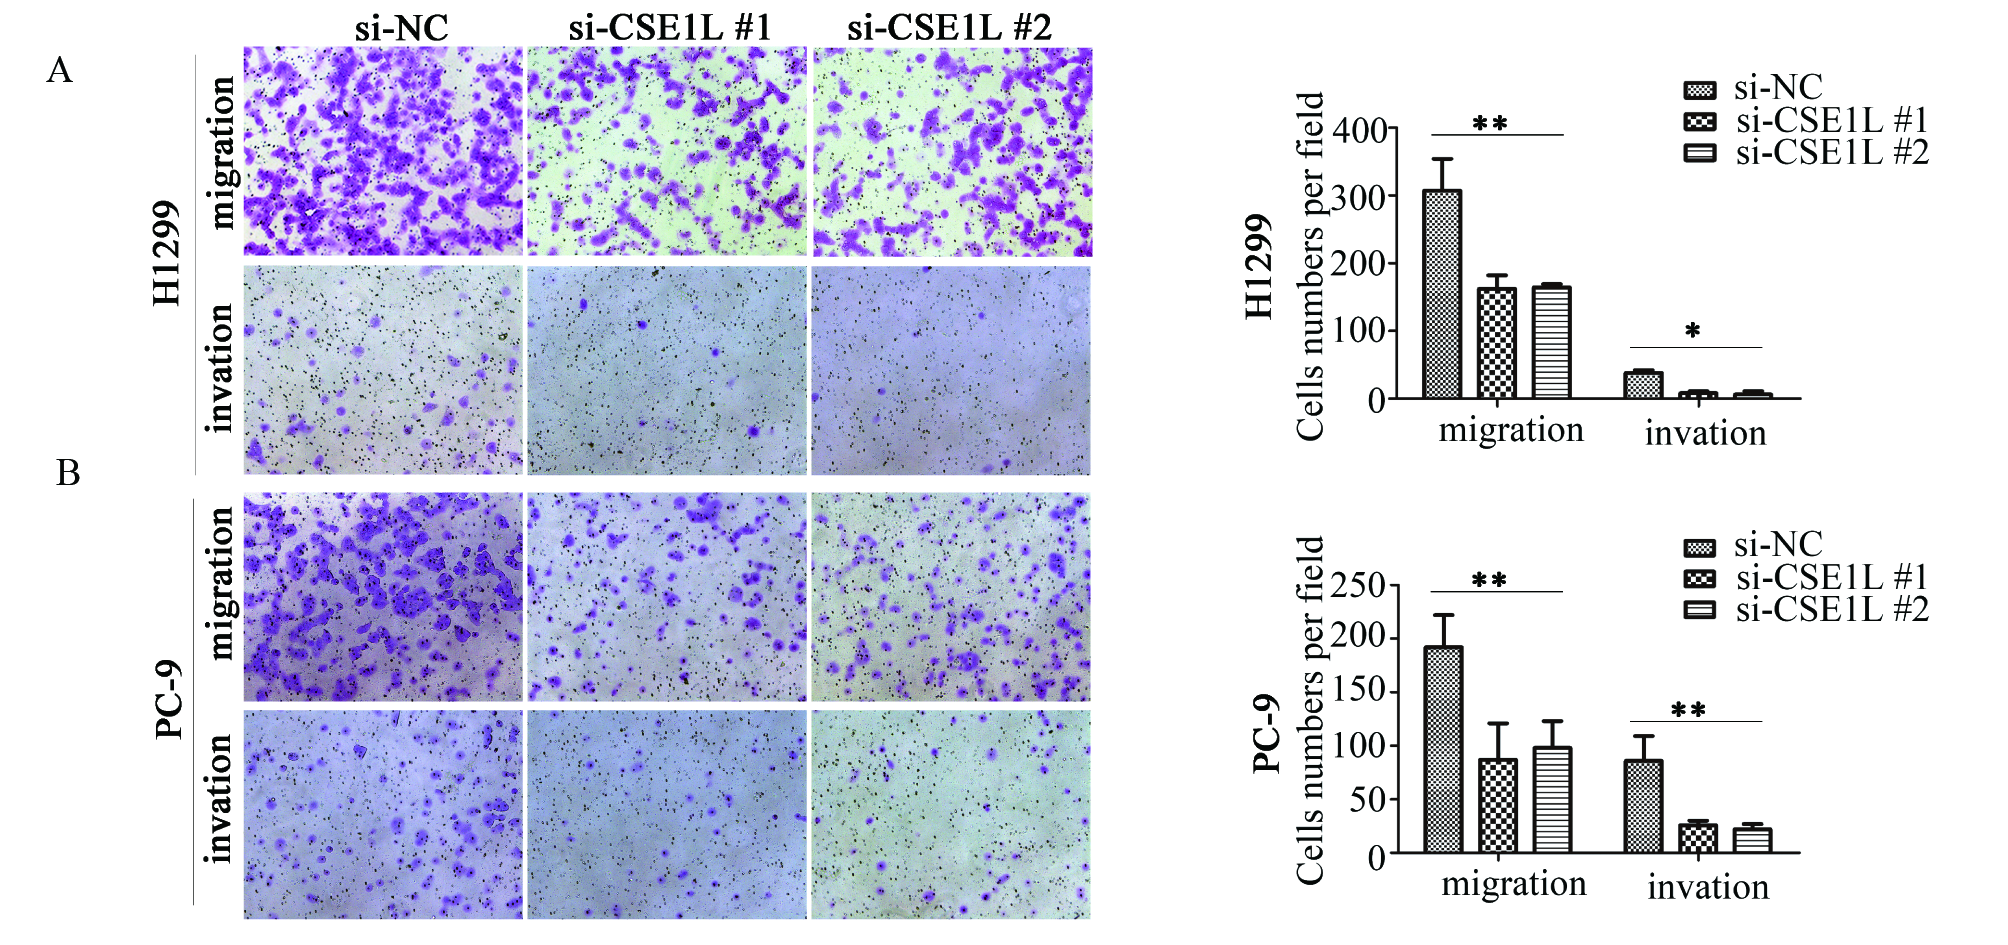


Figure S4


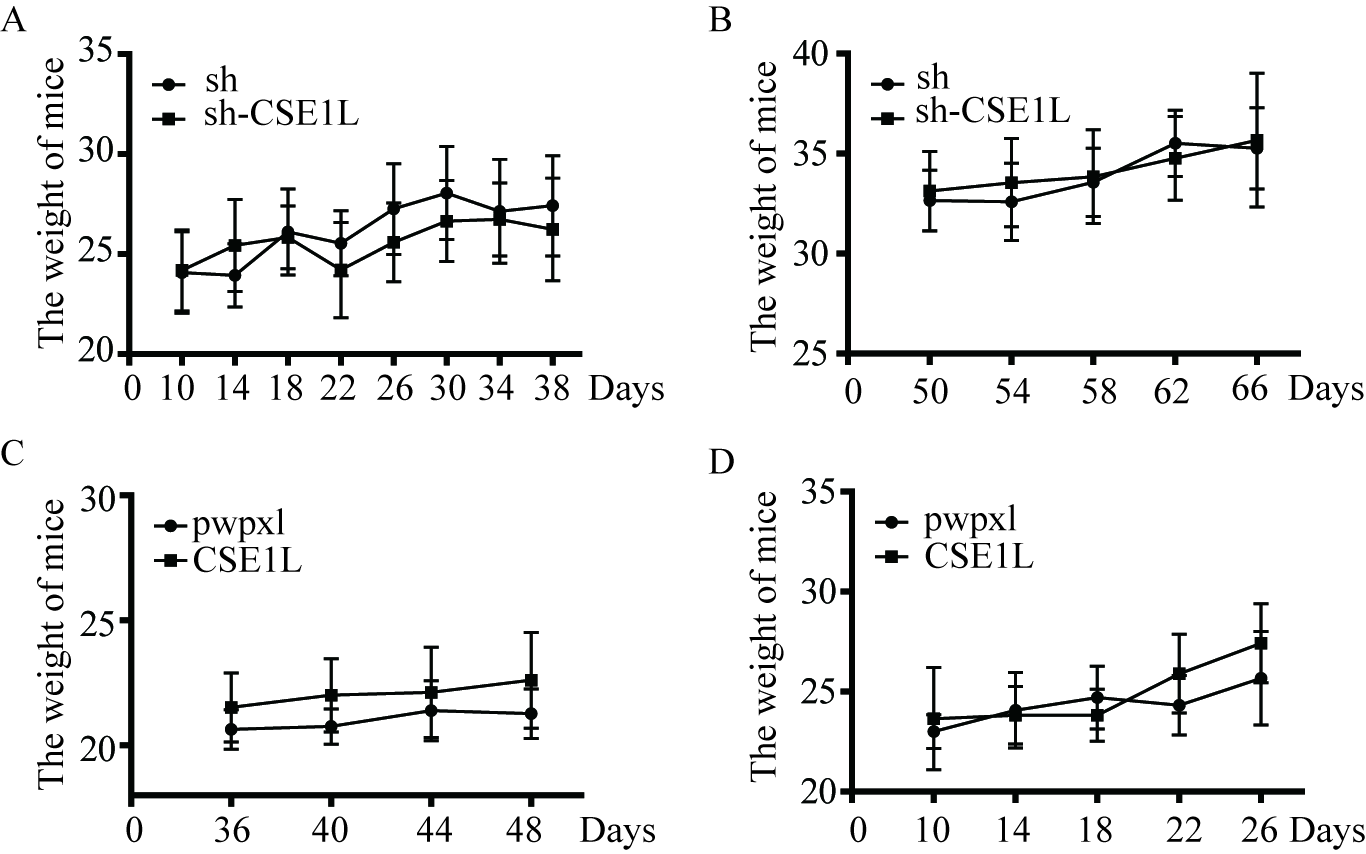


Figure S5


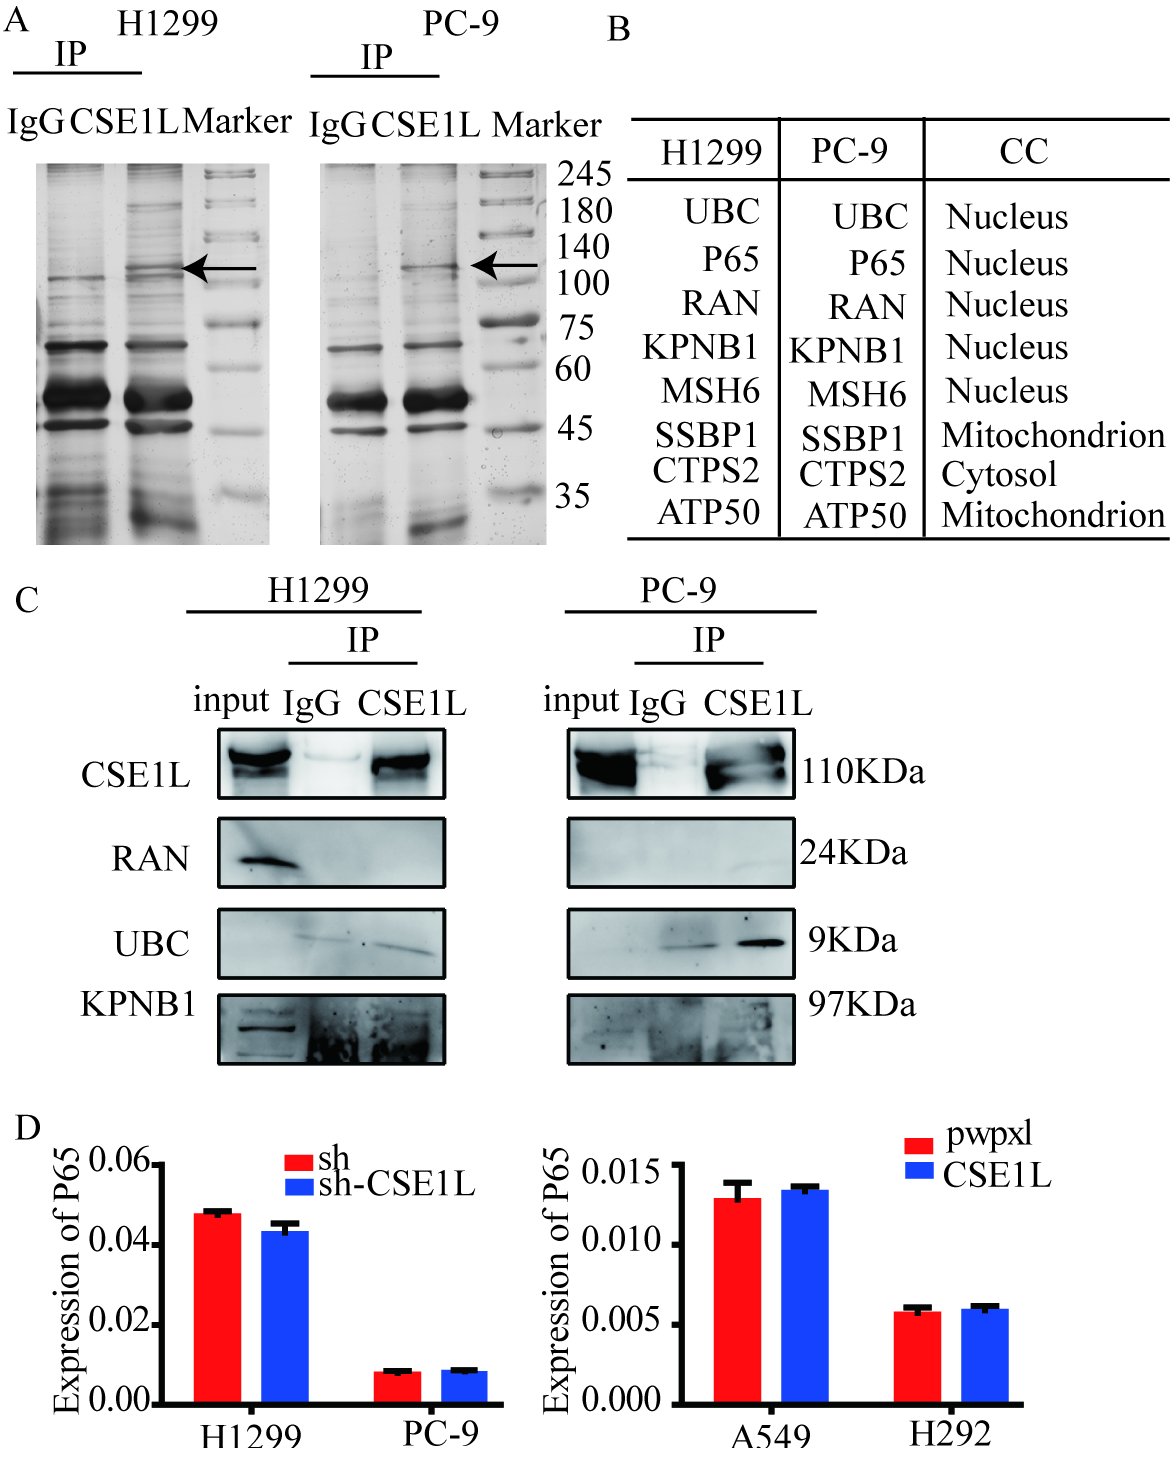


Figure S6


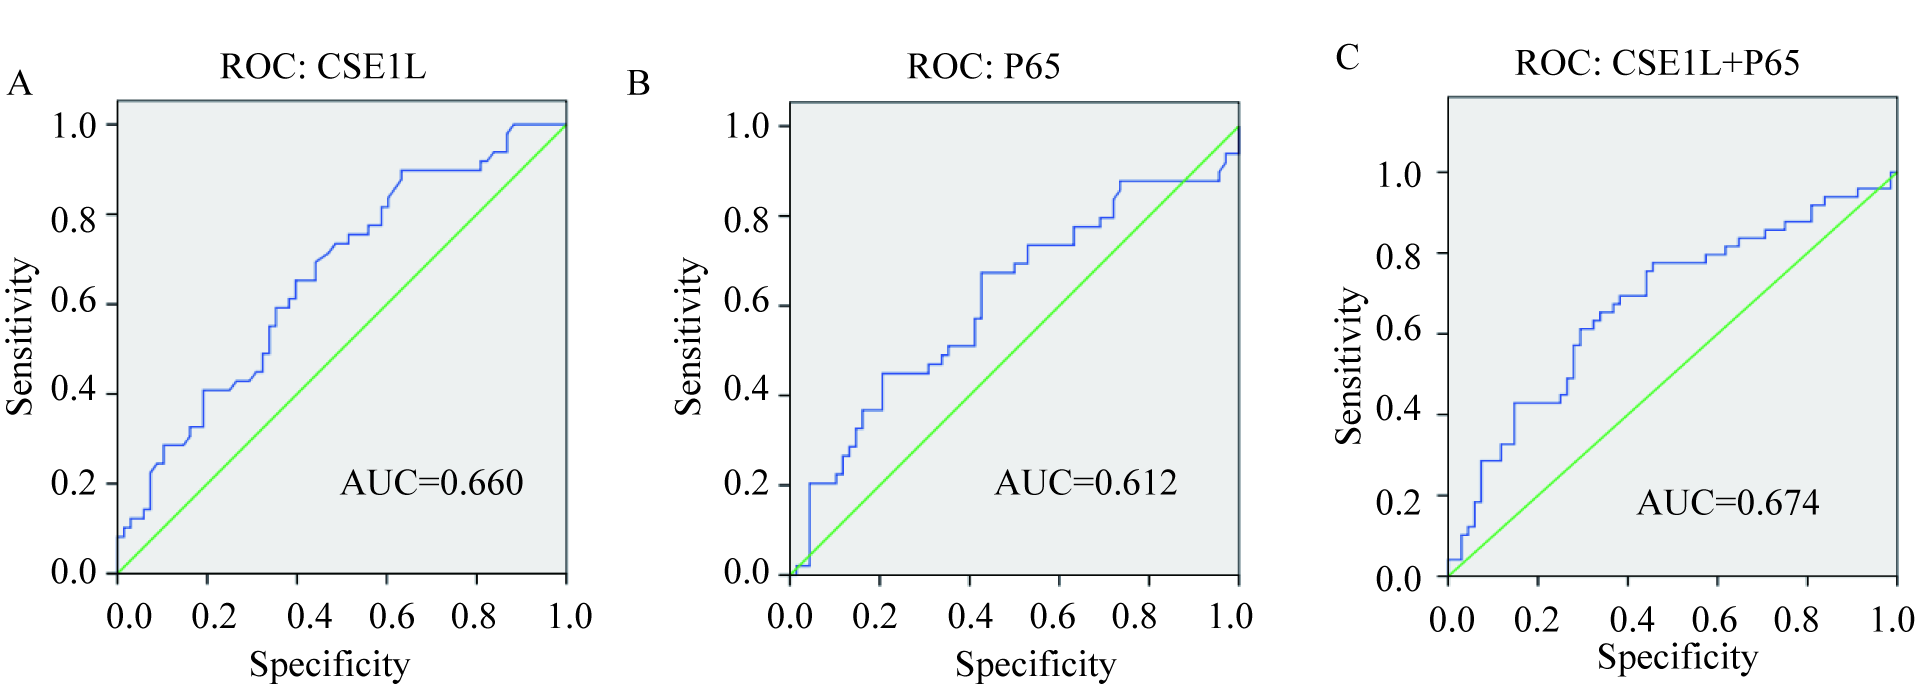


Supplementary Table 1. The primers used in this study.

| Gene name | Forward-primer | Reverse-primer |
| --- | --- | --- |
| β-actin | GTCATTCCAAATATGAGATGCGT | ATCGGAGCGTAGGATGGAAT |
| CSE1L | GCAGCTCATGCTCTTGAACG | GCCAGGAAGTGTGAGAGCTT |
| RELA | ATGTGGAGATCATTGAGCAGC | CCTGGTCCTGTGTAGCCATT |
| Tpl2 | GAGCGTTCTAAGTCTCTGCTG | GCAAGCAAATCCTCCACAGTTC |
| MKK4 | TGCAGGGTAAACGCAAAGCA | CTCCTGTAGGATTGGGATTCAGA |
| MKK7 | CCACGTCATTGCCGTTAAGC | GCACGATGTAGGGGCAGTC |
| JNK1 | TGTGTGGAATCAAGCACCTTC | AGGCGTCATCATAAAACTCGTTC |
| JNK2 | GAAACTAAGCCGTCCTTTTCAGA | TCCAGCTCCATGTGAATAACCT |
| JNK3 | CAGATGGAATTAGACCATGAGCG | TCAATGTGCAATCAGACTTGACT |
| ITCH | TGATGATGGCTCCAGATCCAA | GACTCTCCTATTTTCACCAGCTC |
| CFLAR | CTCTTTTTGTGCCGGGATGTT | CGACAGACAGCTTACCTCTTTC |
| MEK1 | CAATGGCGGTGTGGTGTTC | GATTGCGGGTTTGATCTCCAG |
| ERK2 | TACACCAACCTCTCGTACATCG | CATGTCTGAAGCGCAGTAAGATT |
| ERK1 | CTACACGCAGTTGCAGTACAT | CAGCAGGATCTGGATCTCCC |
| MSK2 | ACGCTGCACTACGCTTTCC | CCGAAGTCCGTGAGGACAATG |
| MSK1 | CTCCTCACTGTCAAGCACGAG | GCCTTTTGAACGATTGTTGCCT |
| CREB | GCACCTGGACCACTTTACGG | AGCACAGGGTCATCAAAGAAG |
| JUN | TCCAAGTGCCGAAAAAGGAAG | CGAGTTCTGAGCTTTCAAGGT |
| P38 | CCCGAGCGTTACCAGAACC | TCGCATGAATGATGGACTGAAAT |
| FOS | GGGGCAAGGTGGAACAGTTAT | CCGCTTGGAGTGTATCAGTCA |
| DDIT3 | GGAAACAGAGTGGTCATTCCC | CTGCTTGAGCCGTTCATTCTC |
| GADD45B | TACGAGTCGGCCAAGTTGATG | GGATGAGCGTGAAGTGGATTT |
| GADD45A | GAGAGCAGAAGACCGAAAGGA | CAGTGATCGTGCGCTGACT |
| ATP6V0B | CCATCGGAACTACCATGCAGG | TCCACAGAAGAGGTTAGACAGG |
| ATP6V0E1 | GTCCTAACCGGGGAGTTATCA | AAAGAGAGGGTTGAGTTGGGC |
| PEA15 | CCTGACCTACTCACTATGGTGG | GATACGGGTTAGCTTGGTGTC |
| CTSL | CTTTTGCCTGGGAATTGCCTC | CATCGCCTTCCACTTGGTC |
| PLEKHM1 | AGCACCTGACGTTTGTCAACA | TGGCAGACTTGTAGGAGAGTTC |
| MAP1LC3B | AAGGCGCTTACAGCTCAATG | CTGGGAGGCATAGACCATGT |
| ATM | ATCTGCTGCCGTCAACTAGAA | GATCTCGAATCAGGCGCTTAAA |
| PRKAA2 | CTGTAAGCATGGACGGGTTGA | AAATCGGCTATCTTGGCATTCA |
| JUN | TCCAAGTGCCGAAAAAGGAAG | CGAGTTCTGAGCTTTCAAGGT |

Supplementary Table 2. The sequences for the siRNAs used in this study.

| **Gene name** | **Target sequences** |
| --- | --- |
| Si-CSE1L 1 | GGATAATGTTATCAAAGTA |
| Si-CSE1L 2 | CGACGGTATCAAATATATT |
| Si-P65 1 | GATTGAGGAGAAACGTAAA |
| Si-P65 2 | CCCACGAGCTTGTAGGAAA |
| Si-P65 3 | GCATCCAGACCAACAACAA |

Supplementary Table 3. The primary antibodys used in this study.

| **Name** | **Company** | **Catalog Number** | **Assay** |
| --- | --- | --- | --- |
| CSE1L | Abcam | Ab70547 | WB |
| CSE1L  CSE1L | Proteintech  Abnova | [22219-1-AP](http://www.ptgcn.com/products/CSE1L-Antibody-22219-1-AP.htm)  H00001434-M08 | WB, IHC  WB, IF, IHC |
| P65 | Cell Signaling Technology | #8242 | WB, IHC |
| P65 | Cell Signaling Technology | #6956 | WB, IF |
| KPNB1 | Cell Signaling Technology | #51186 | WB |
| BAX  BAK  BAD  P-BAD  MCL-1  BECN1  BCL-W  BCL-XL  BCL-2  P-BCL-2  Caspase 7  Caspase 3  Caspase 8  CREB  ITCH  JNK  P-JNK  MEK1/2  P-MEK1/2  MSK1  P-MSK1  ERK1/2  P-ERK1/2  MKK7  CCND1  CCND2  RAN  UBC  Lamin A/C | Proteintech  Abcam  A Brand of bioscience  Abcam  Proteintech  Proteintech  Cell Signaling Technology  Cell Signaling Technology  Cell Signaling Technology  Cell Signaling Technology  Proteintech  Proteintech  Proteintech  Cell Signaling Technology  Cell Signaling Technology  Cell Signaling Technology  Cell Signaling Technology  Cell Signaling Technology  Cell Signaling Technology  Cell Signaling Technology  Cell Signaling Technology  Cell Signaling Technology  Cell Signaling Technology  Cell Signaling Technology  Proteintech  Proteintech  BBI Life Science  BBI Life Science  Cell Signaling Technology | 50599-2-lg  Ab32371  #AB32330  Ab129192  16225-1-AP  66665-1-lg  #2724  #2769  #4223  #2827  27155-1-AP  66470-2-lg  66093-1-lg  #9197  #12117  #3708  #4668  #9122  #9121  #3489  #9595  #4695  #4370  #4172  60186-1-lg  67048-1-lg  D122970  D625594  #2032 | WB  WB  WB  WB  WB  WB  WB  WB  WB  WB  WB  WB  WB  WB  WB  WB  WB  WB  WB  WB  WB  WB  WB  WB  WB  WB  WB  WB  WB |
| β-actin | Proteintech | HRP-60008 | WB |

| Supplementary Table 4 Correlation Between Tissue CSE1L Protein Levels in NSCLC Patients and Their Clinicopathologic Characteristics. | | | | | | | | | | |
| --- | --- | --- | --- | --- | --- | --- | --- | --- | --- | --- |
| Clinical Pathology | CSE1L expression | | | | | P value | | *ⅹ*2 value |
| Low | | High | | |
| Gender |  | |  | |  | | |  |
| Male(51) | 12 | | 39 | |  | | |  |
| Female(49) | 13 | | 36 | | 0.454 | | | 0.120 |
| Age |  | |  | |  | | |  |
| ≤62(52) | 13 | | 39 | |  | | |  |
| >62(48) | 12 | | 36 | | 0.591 | | | 0.000 |
| Histological Grade |  | |  | |  | | |  |
| Ⅰ/Ⅰ-Ⅱ(17) | 4 | | 13 | |  | | |  |
| Ⅱ(57) | 15 | | 42 | |  | | |  |
| Ⅱ-Ⅲ/Ⅲ(26) | 6 | | 20 | | 0.940 | | | 0.124 |
| Clinical Stage |  | |  | |  | | |  |
| 1AB(39) | 9 | | 30 | |  | | |  |
| 2AB/3AB(61) | 16 | | 45 | | 0.456 | | | 0.126 |
| T stage |  | |  | |  | | |  |
| T1(33) | 11 | | 22 | |  | | |  |
| T2(53) | 11 | | 42 | |  | | |  |
| T3/T4(14) | 3 | | 11 | | 0.401 | | | 1.827 |
| N Stage |  | |  | |  | | |  |
| N0(48) | 10 | | 38 | |  | | |  |
| Nx (52) | 15 | | 37 | | 0.245 | | | 0.855 |
| Carcinoma |  | |  | |  | | |  |
| Tumor(100) | 25 | | 75 | |  | | |  |
| Adjacent(100) | 67 | | 33 | | 0.0001* | | | 35.511 |
| P value represents the probability from a chi-square test for tissue CSE1L protein  levels between variable subgroups. Low: 0-4; High: 5-12. *P < 0.05. | | | | | | | | | | |
| Supplementary Table 5 Correlation Between Tissue CSE1L mRNA Levels in NSCLC Patients and Their Clinicopathologic Characteristics. | | | | | | | | | | |
| Clinical Pathology | CSE1L expression | | | P value | | | *ⅹ*2 value | | |
| Low | High | |
| Gender |  |  | |  | | |  | | |
| Male(26) | 14 | 12 | |  | | |  | | |
| Female(41) | 17 | 24 | | 0.230 | | | 0.981 | | |
| Age |  |  | |  | | |  | | |
| ≤62(25) | 12 | 13 | |  | | |  | | |
| >62(42) | 19 | 23 | | 0.513 | | | 0.048 | | |
| Histological Grade |  |  | |  | | |  | | |
| Ⅰ (9) | 3 | 6 | |  | | |  | | |
| Ⅱ(38) | 19 | 19 | |  | | |  | | |
| Ⅱ-Ⅲ/Ⅲ(20) | 9 | 11 | | 0.660 | | | 0.831 | | |
| Clinical Stage |  |  | |  | | |  | | |
| 1AB(39) | 9 | 30 | |  | | |  | | |
| 2AB/3AB(61) | 16 | 45 | | 0.456 | | | 0.126 | | |
| T stage |  |  | |  | | |  | | |
| T1(23) | 21 | 19 | |  | | |  | | |
| T2(33) | 6 | 8 | |  | | |  | | |
| T3/T4(11) | 4 | 9 | | 0.378 | | | 1.946 | | |
| N Stage |  |  | |  | | |  | | |
| N0(54) | 26 | 28 | |  | | |  | | |
| Nx (13) | 5 | 8 | | 0.377 | | | 0.395 | | |
| Carcinoma |  |  | |  | | |  | | |
| Tumor(100) | 31 | 36 | |  | | |  | | |
| Adjacent(100) | 40 | 27 | | 0.0001* | | | 22.485 | | |
| P value represents the probability from a chi-square test for tissue CSE1L mRNA  levels between variable subgroups. Low: 0-4; High: 5-12. *P < 0.05. | | | | | | | | | | |

| Supplementary Table 6. Correlation Between Tissue P65 Protein Levels in NSCLC Patients and Their Clinicopathologic Characteristics. | | | | | |
| --- | --- | --- | --- | --- | --- |
| Clinical Pathology | P65 expression | | P value | *ⅹ*2 value |
| Low | High |
| Gender |  |  |  |  |
| Male(15) | 8 | 7 |  |  |
| Female(10) | 2 | 8 | 0.105 | 2.778 |
| Age |  |  |  |  |
| ≤62(15) | 6 | 9 |  |  |
| >62(10) | 4 | 6 | 0.659 | 0.000 |
| Histological Grade |  |  |  |  |
| Ⅰ/Ⅰ-Ⅱ(4) | 4 | 0 |  |  |
| Ⅱ(14) | 6 | 8 |  |  |
| Ⅱ-Ⅲ/Ⅲ(7) | 0 | 7 | 0.005* | 10.714 |
| Clinical Stage |  |  |  |  |
| 1AB(2) | 2 | 0 |  |  |
| 2AB(23) | 8 | 15 | 0.150 | 3.261 |
| T stage |  |  |  |  |
| T1(13) | 7 | 6 |  |  |
| T2(12) | 3 | 9 | 0.144 | 2.163 |
| N Stage |  |  |  |  |
| N0(2) | 2 | 0 |  |  |
| Nx (23) | 8 | 15 | 0.150 | 3.261 |
| Carcinoma |  |  |  |  |
| Tumor(25) | 10 | 15 |  |  |
| Adjacent(25) | 15 | 10 | 0.1573 | 2.000 |
| P value represents the probability from a chi-square test for tissue P65 levels between variable subgroups. Low: 0-4; High: 5-12. *P < 0.05. | | | | | |
